# Supplementary material
Source: PubMed Central journal article supplement (PMC6201249)
Supplement: NIHMS986473-supplement-Supplemental_Materials.pdf [file NIHMS986473-supplement-Supplemental_Materials.pdf]

# Antibiotic Resistance Increases with Local Temperature: Supplementary Information

a

| Average min temp              | Average temp                  | Negative latitude             |
|-------------------------------|-------------------------------|-------------------------------|
| Trimethoprim-Sulfamethoxazole | Trimethoprim-Sulfamethoxazole | Trimethoprim-Sulfamethoxazole |
| Amoxicillin                   | Amoxicillin                   | Amoxicillin                   |
| Tetracycline/Doxycycline      | Tetracycline/Doxycycline      | Tetracycline/Doxycycline      |
| Ampicillin-Sulbactam          | Ampicillin-Sulbactam          | Ampicillin-Sulbactam          |
| Gentamicin                    | Gentamicin                    | Gentamicin                    |
| Tobramycin                    | Tobramycin                    | Tobramycin                    |
| Levofloxacin                  | Levofloxacin                  | Levofloxacin                  |
| Cefepime                      | Cefepime                      | Cefepime                      |
| Ciprofloxacin                 | Ciprofloxacin                 | Ciprofloxacin                 |
| Cephalexin                    | Cephalexin                    | Cephalexin                    |
| Piperacillin-Tazobactam       | Piperacillin-Tazobactam       | Piperacillin-Tazobactam       |
| Ceftazidime                   | Ceftazidime                   | Ceftazidime                   |
| Ceftriaxone                   | Ceftriaxone                   | Ceftriaxone                   |
| Amoxicillin-Clavulanic acid   | Amoxicillin-Clavulanic acid   | Amoxicillin-Clavulanic acid   |
| Nitrofurantoin                | Nitrofurantoin                | Nitrofurantoin                |
| Amikacin                      | Amikacin                      | Amikacin                      |
| Aztreonam                     | Aztreonam                     | Aztreonam                     |
| Imipenem                      | Imipenem                      | Imipenem                      |
| Meropenem                     | Meropenem                     | Meropenem                     |
| Cefuroxime                    | Cefuroxime                    | Cefuroxime                    |
| Ertapenem                     | Ertapenem                     | Ertapenem                     |

b

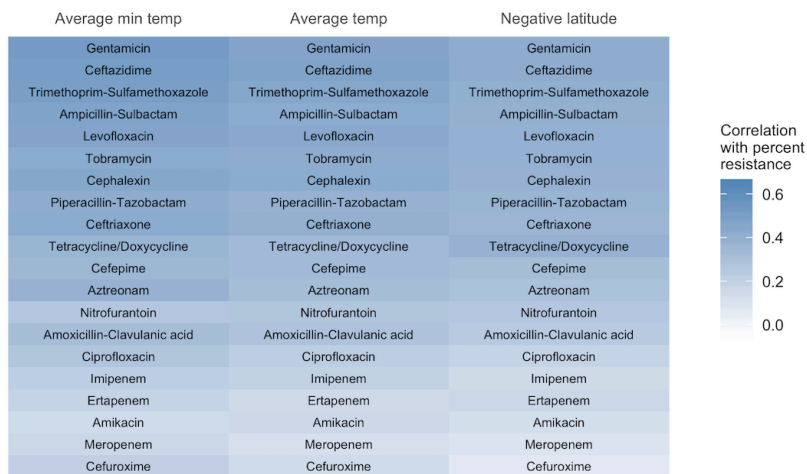

c

| Average min temp              | Average temp                  | Negative latitude             |
|-------------------------------|-------------------------------|-------------------------------|
| Quinupristin/Dalfupristin     | Quinupristin/Dalfupristin     | Quinupristin/Dalfupristin     |
| Erythromycin                  | Erythromycin                  | Erythromycin                  |
| Trimethoprim-Sulfamethoxazole | Trimethoprim-Sulfamethoxazole | Trimethoprim-Sulfamethoxazole |
| Cloxacillin                   | Cloxacillin                   | Cloxacillin                   |
| Nitrofurantoin                | Nitrofurantoin                | Nitrofurantoin                |
| Cephalexin                    | Cephalexin                    | Cephalexin                    |
| Levofloxacin                  | Levofloxacin                  | Levofloxacin                  |
| Rifampin                      | Rifampin                      | Rifampin                      |
| Tetracycline/Doxycycline      | Tetracycline/Doxycycline      | Tetracycline/Doxycycline      |
| Vancomycin                    | Vancomycin                    | Vancomycin                    |
| Ciprofloxacin                 | Ciprofloxacin                 | Ciprofloxacin                 |
| Nafcillin                     | Nafcillin                     | Nafcillin                     |
| Clindamycin                   | Clindamycin                   | Clindamycin                   |
| Daptomycin                    | Daptomycin                    | Daptomycin                    |
| Penicillin                    | Penicillin                    | Penicillin                    |
| Linezolid                     | Linezolid                     | Linezolid                     |
| Moxifloxacin                  | Moxifloxacin                  | Moxifloxacin                  |

**Supplementary Figure 1 | Correlation between climate and latitude variables with antibiotic resistance.** Correlation of predictor (30-year mean minimum temperature, 30-year mean temperature, latitude) with antibiotic resistance (%) by pathogen: (A) *E. coli*; (B) *K. pneumoniae*; and (C) *S. aureus*.

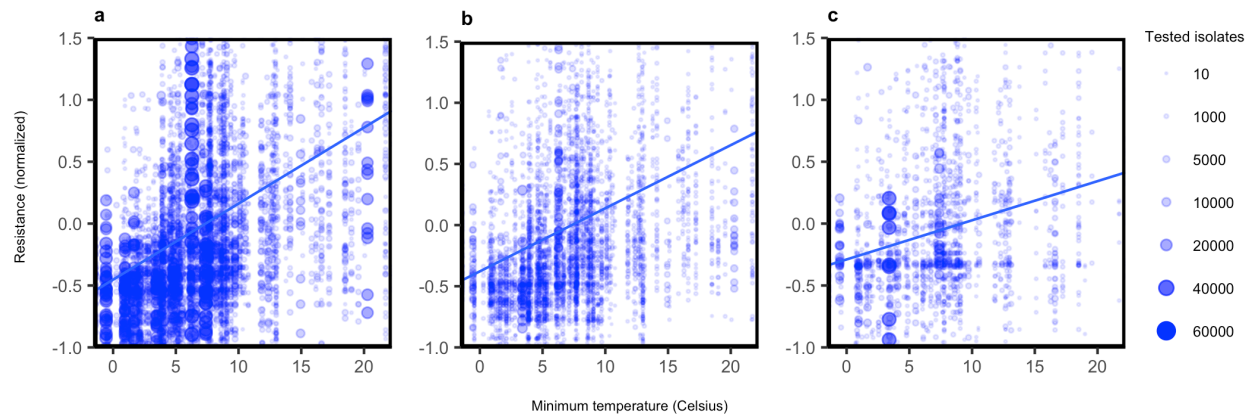

**Supplementary Figure 2 | Association between minimum temperature and antibiotic resistance.** Scatter plots of mean normalized antibiotic resistance versus minimum temperature (°C) for all tested antibiotics, by pathogen: (A) *E. coli*; (B) *K. pneumoniae*; and (C) *S. aureus*. Unadjusted weighted linear trend lines are shown in blue.

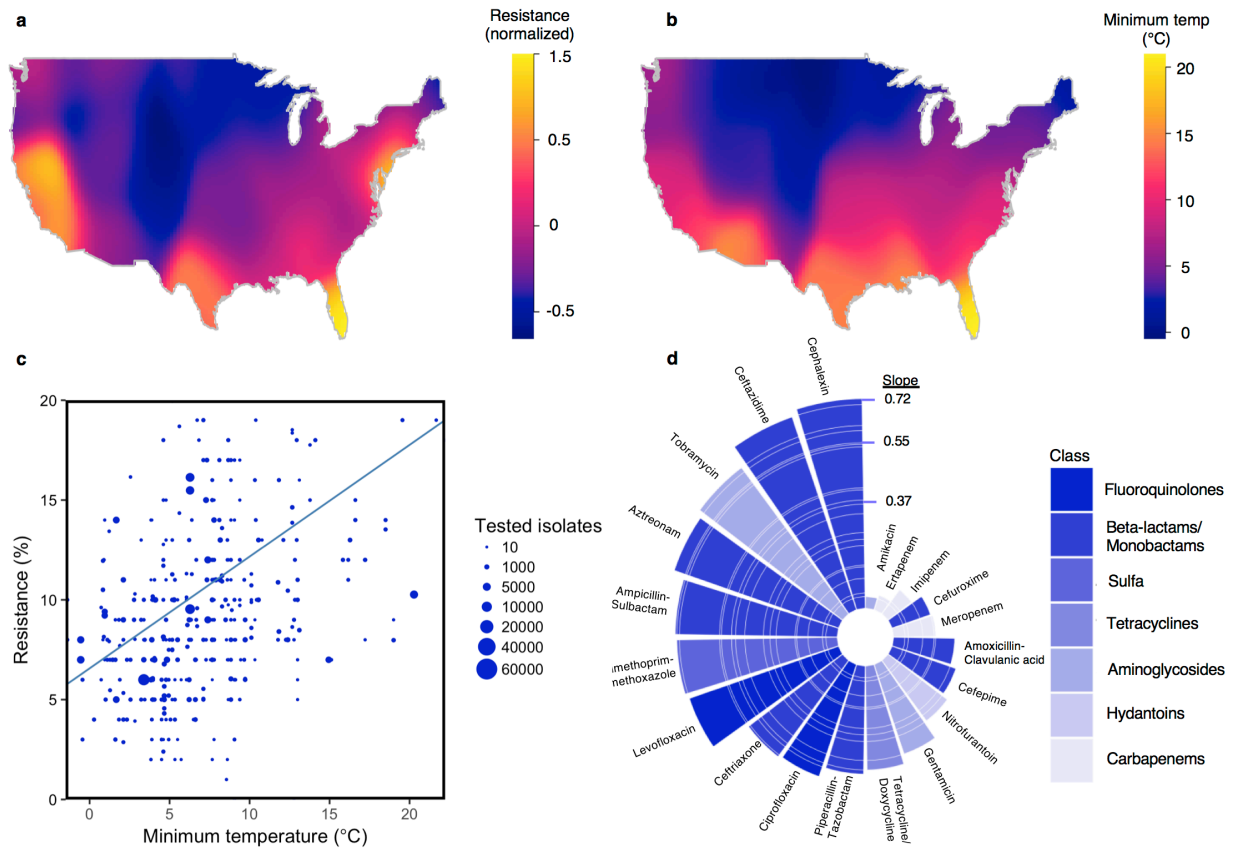

**Supplementary Figure 3 | Antibiotic resistance and minimum temperature (*K.***

***pneumoniae*).** (A) A heatmap of mean normalized antibiotic resistance for *K. pneumoniae* for all antibiotics across the United States. (B) A heatmap of 30-year average minimum temperature (°C) across the United States. (C) A scatter plot of antibiotic resistance versus minimum temperature for *K. pneumoniae* and trimethoprim-sulfamethoxazole. Unadjusted weighted linear trend line is shown in blue. (D) Slope of unadjusted relationship (% Resistance/°C) between minimum temperature and antibiotic resistance by antibiotic for *K. pneumoniae*. Antibiotic class coded by color shading.

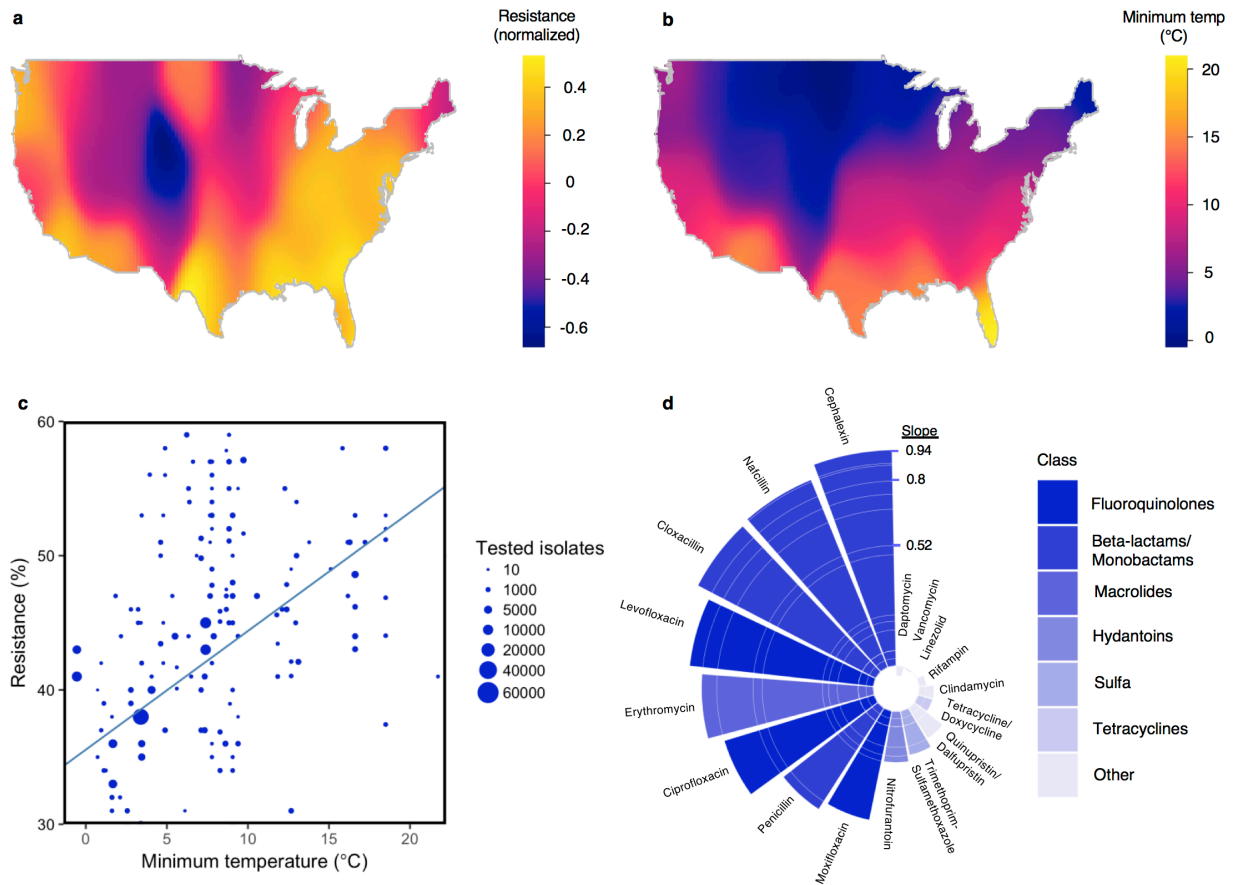

**Supplementary Figure 4 | Antibiotic resistance and minimum temperature (*S. aureus*). (A)**

A heatmap of mean normalized antibiotic resistance for *S. aureus* for all antibiotics across the United States. (B) A heatmap of 30-year average minimum temperature (°C) across the United States. (C) A scatter plot of antibiotic resistance versus minimum temperature for *S. aureus* and cloxacillin. Unadjusted weighted linear trend line is shown in blue. (D) Slope of unadjusted relationship (% Resistance/°C) between minimum temperature and antibiotic resistance by antibiotic for *S. aureus*. Antibiotic class coded by color shading.

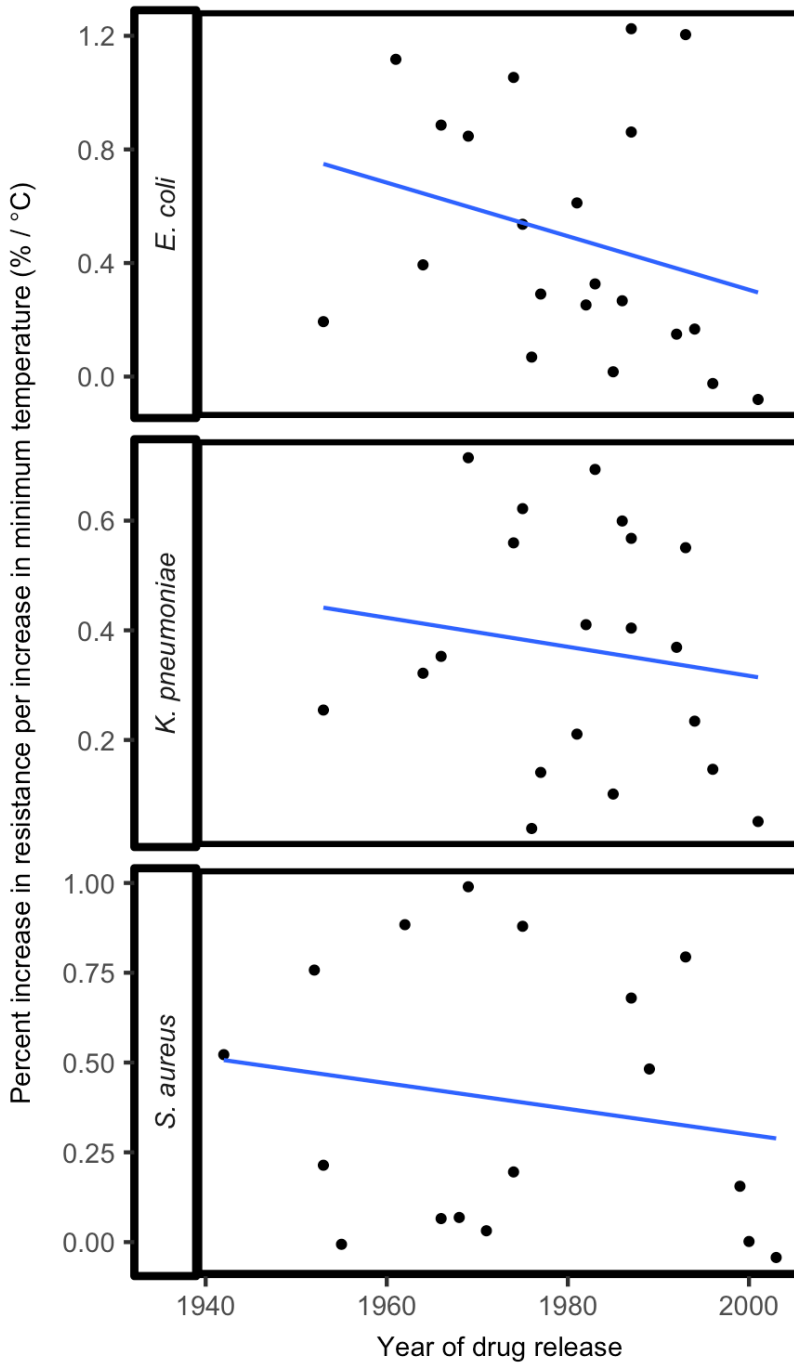

**Supplementary Figure 5 | Antibiotic specific association between minimum temperature and antibiotic resistance versus approximate antibiotic introduction time in the United States<sup>1</sup>.**

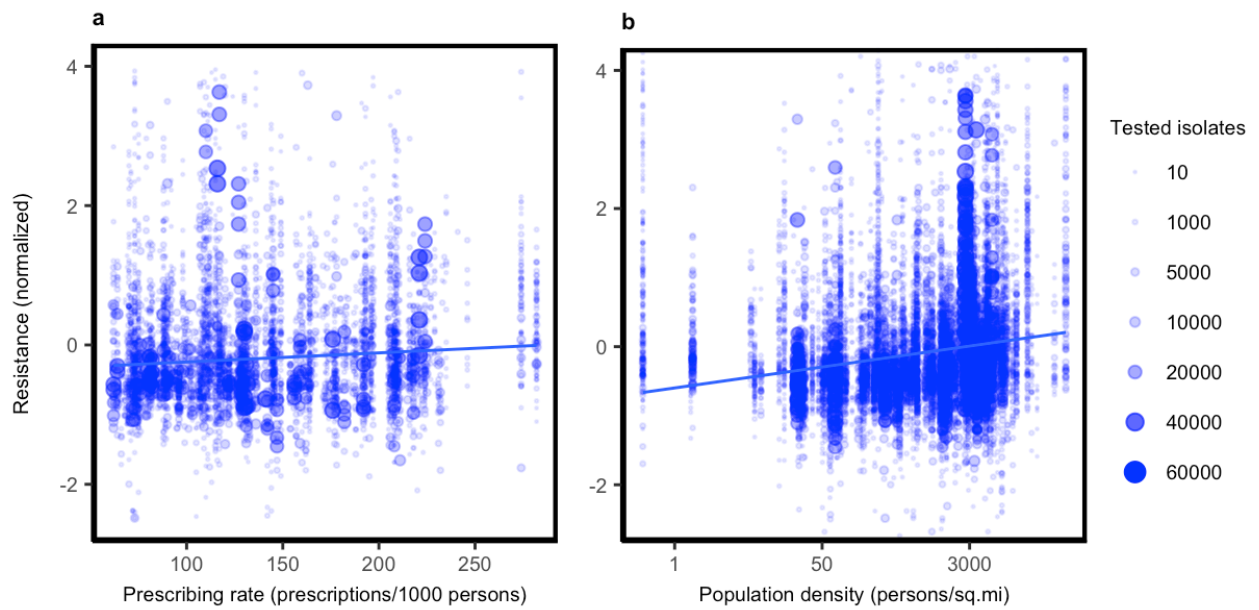

**Supplementary Figure 6 | Additional important predictors of antibiotic resistance, population density and prescribing rate.** Scatter plots of the association between mean normalized antibiotic resistance with (A) annual prescription rate (prescriptions per 1000 persons); and (B) population density (persons/mi<sup>2</sup>), in *E. coli*, *K. pneumoniae*, and *S. aureus*. Data point size corresponds to number of isolates. Unadjusted weighted linear trend lines are shown in blue.

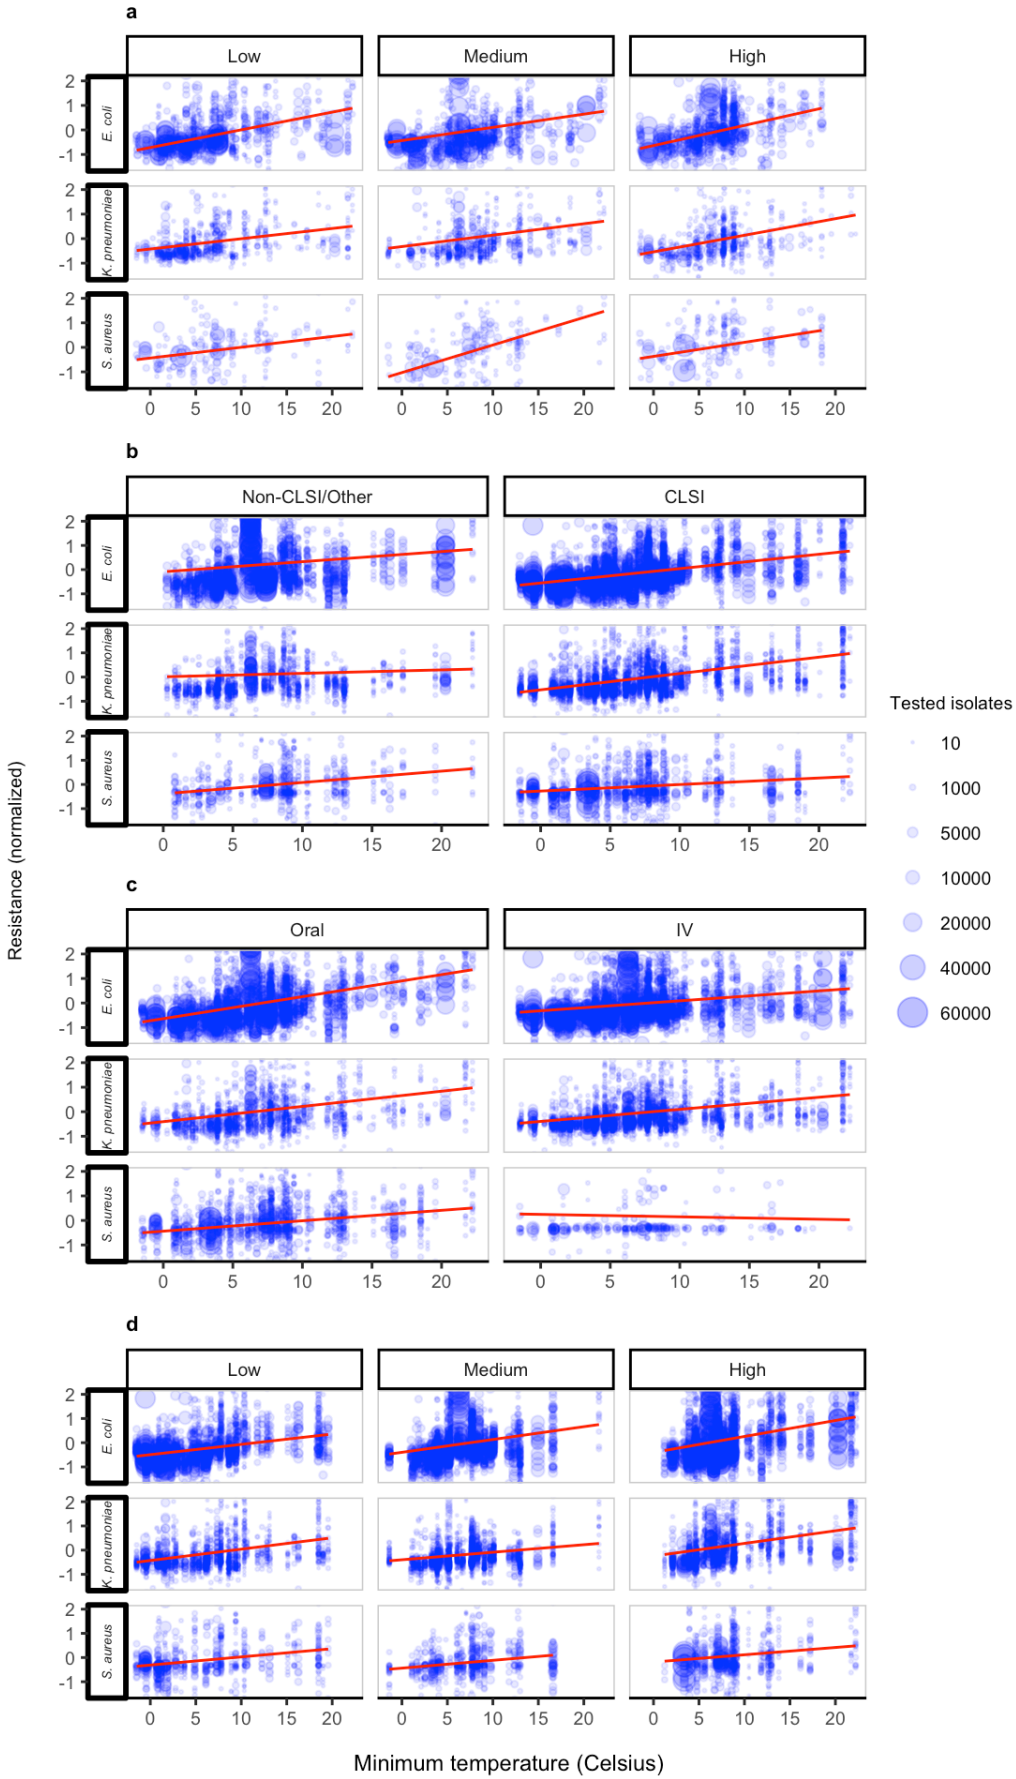



**Supplementary Figure 7 | Evaluating relationship of minimum temperature and antibiotic resistance across other covariates.** Scatter plots of mean normalized antibiotic resistance (%) versus minimum temperature ( $^{\circ}\text{C}$ ) by: (A) tertile of prescription rate (annual prescriptions/1000 persons); (B) reported laboratory standard (CLSI vs. other/not reported); (C) oral/IV formulation; and (D) tertile of population density (persons/ $\text{mi}^2$ ). Unadjusted weighted linear trend lines are shown in red.

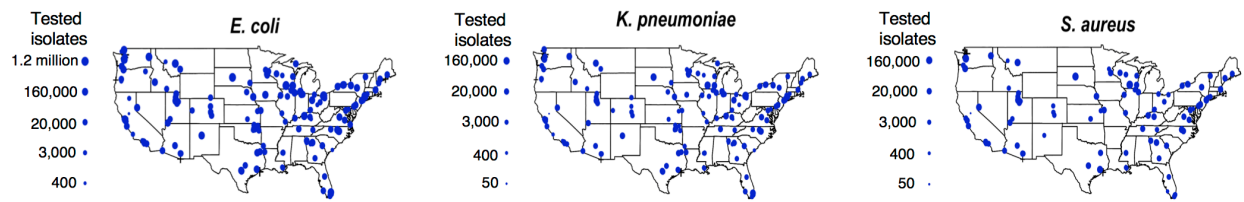

**Supplementary Figure 8 | Distribution of antibiotic resistance data across the United**

**States.** A map of the United States showing locations of antibiotic resistance indices used as data points in this analysis, as a function of number of isolate tests (data point size), by pathogen (A) *E. coli*, (B) *K. pneumoniae*, and (C) *S. aureus*.

**Supplementary Table 1 | Antibiotic and organism specific adjusted estimates of association between minimum temperature and antibiotic resistance.**

| <b>Bacteria</b>         | <b>Drug</b>                 | <b>Minimum temp</b> | <b>P-Value</b> |
|-------------------------|-----------------------------|---------------------|----------------|
| <i>E. coli</i>          | Amoxicillin                 | 0.98                | <0.0001        |
|                         | Amoxicillin-Clavulanic acid | 0.31                | 0.08           |
|                         | Ampicillin-Sulbactam        | 0.64                | <0.0001        |
|                         | Cefepime                    | 0.06                | 0.22           |
|                         | Ceftazidime                 | 0.26                | 0.0005         |
|                         | Ceftriaxone                 | 0.15                | 0.13           |
|                         | Cefuroxime                  | 0.19                | 0.40           |
|                         | Cephalexin                  | 0.61                | <0.0001        |
|                         | Ciprofloxacin               | 0.56                | 0.12           |
|                         | Levofloxacin                | 0.67                | 0.0018         |
| Piperacillin-Tazobactam | 0.14                        | <0.0001             |                |
| <i>K. pneumoniae</i>    | Amoxicillin-Clavulanic acid | -0.12               | 0.11           |
|                         | Ampicillin-Sulbactam        | 0.36                | <0.0001        |
|                         | Cefepime                    | 0.04                | 0.17           |
|                         | Ceftazidime                 | 0.45                | <0.0001        |
|                         | Ceftriaxone                 | 0.19                | <0.0001        |
|                         | Cefuroxime                  | 0.02                | 0.83           |
|                         | Cephalexin                  | 0.52                | <0.0001        |
|                         | Ciprofloxacin               | 0.11                | 0.05           |
|                         | Levofloxacin                | 0.28                | <0.0001        |
|                         | Piperacillin-Tazobactam     | 0.23                | <0.0001        |
| <i>S. aureus</i>        | Cephalexin                  | 0.51                | 0.10           |
|                         | Ciprofloxacin               | 0.29                | 0.0001         |
|                         | Cloxacillin                 | 0.58                | <0.0001        |
|                         | Erythromycin                | 0.54                | <0.0001        |
|                         | Levofloxacin                | 0.39                | 0.18           |
|                         | Moxifloxacin                | 0.89                | 0.16           |
|                         | Nafcillin                   | 0.84                | 0.10           |
|                         | Penicillin                  | -0.07               | 0.87           |

Sub-analysis of selected effect estimates and p-values for the association between minimum temperature and antibiotic resistance from full adjusted multivariable models restricted to specific antibiotic susceptibilities (for those antibiotics with available prescribing data). Individual models allow for different effects (modification) by antibiotic type and organism, but are subject to reduced sample size/power.

**Supplementary Table 2 | Model predictor variable correlations.**

| <b>Correlation Matrix</b>              |        |                   |            |              |                    |               |
|----------------------------------------|--------|-------------------|------------|--------------|--------------------|---------------|
| <b><i>E. coli</i></b>                  |        |                   |            |              |                    |               |
|                                        | T min  | Prescription rate | Outpatient | Lab standard | Population density | Median income |
| T min                                  | 1.000  |                   |            |              |                    |               |
| Prescription rate                      | 0.008  | 1.000             |            |              |                    |               |
| Outpatient                             | -0.123 | 0.042             | 1.000      |              |                    |               |
| Lab standard                           | -0.048 | 0.009             | -0.025     | 1.000        |                    |               |
| Population density                     | 0.237  | -0.096            | 0.040      | -0.060       | 1.000              |               |
| Median income                          | 0.081  | -0.017            | 0.028      | -0.086       | 0.443              | 1.000         |
| <b><i>Klebsiella</i></b>               |        |                   |            |              |                    |               |
|                                        | T min  | Prescription rate | Outpatient | Lab standard | Population density | Median income |
| T min                                  | 1.000  |                   |            |              |                    |               |
| Prescription rate                      | 0.005  | 1.000             |            |              |                    |               |
| Outpatient                             | -0.119 | 0.042             | 1.000      |              |                    |               |
| Lab standard                           | -0.033 | 0.015             | -0.014     | 1.000        |                    |               |
| Population density                     | 0.224  | -0.116            | 0.047      | -0.057       | 1.000              |               |
| Median income                          | 0.073  | -0.033            | 0.046      | -0.095       | 0.451              | 1.000         |
| <b><i>S. aureus</i></b>                |        |                   |            |              |                    |               |
|                                        | T min  | Prescription rate | Outpatient | Lab standard | Population density | Median income |
| T min                                  | 1.000  |                   |            |              |                    |               |
| Prescription rate                      | 0.029  | 1.000             |            |              |                    |               |
| Outpatient                             | -0.226 | 0.018             | 1.000      |              |                    |               |
| Lab standard                           | -0.105 | 0.036             | -0.070     | 1.000        |                    |               |
| Population density                     | 0.188  | -0.072            | 0.061      | -0.092       | 1.000              |               |
| Median income                          | 0.046  | -0.094            | -0.061     | -0.156       | 0.500              | 1.000         |
| <b>Variance inflation factor (VIF)</b> |        |                   |            |              |                    |               |
| Bacteria                               | T min  | Prescription rate | Outpatient | Lab standard | Population density | Median income |
| <i>E. coli</i>                         | 1.217  | 1.012             | 1.020      | 1.114        | 1.273              | 1.239         |
| <i>Klebsiella</i>                      | 1.195  | 1.011             | 1.029      | 1.108        | 1.392              | 1.422         |
| <i>S. aureus</i>                       | 1.274  | 1.024             | 1.124      | 1.253        | 1.473              | 1.450         |

**Supplementary Table 3 | IV and Oral antibiotic classification.**

| <i>E. coli</i>                |      | <i>K. pneumoniae</i>          |      | <i>S. aureus</i>              |      |
|-------------------------------|------|-------------------------------|------|-------------------------------|------|
| Amoxicillin                   | Oral | Amoxicillin-Clavulanic acid   | Oral | Cephalexin                    | Oral |
| Amoxicillin-Clavulanic acid   | Oral | Cefuroxime                    | Oral | Clindamycin                   | Oral |
| Cefuroxime                    | Oral | Cephalexin                    | Oral | Cloxacillin                   | Oral |
| Cephalexin                    | Oral | Ciprofloxacin                 | Oral | Erythromycin                  | Oral |
| Ciprofloxacin                 | Oral | Levofloxacin                  | Oral | Levofloxacin                  | Oral |
| Levofloxacin                  | Oral | Tetracycline/Doxycycline      | Oral | Linezolid                     | Oral |
| Nitrofurantoin                | Oral | Trimethoprim-Sulfamethoxazole | Oral | Moxifloxacin                  | Oral |
| Tetracycline/Doxycycline      | Oral | Amikacin                      | IV   | Penicillin                    | Oral |
| Trimethoprim-Sulfamethoxazole | Oral | Ampicillin-Sulbactam          | IV   | Rifampin                      | Oral |
| Amikacin                      | IV   | Aztreonam                     | IV   | Tetracycline/Doxycycline      | Oral |
| Ampicillin-Sulbactam          | IV   | Cefepime                      | IV   | Trimethoprim-Sulfamethoxazole | Oral |
| Aztreonam                     | IV   | Ceftazidime                   | IV   | Daptomycin                    | IV   |
| Cefepime                      | IV   | Ceftriaxone                   | IV   | Nafcillin                     | IV   |
| Ceftazidime                   | IV   | Ertapenem                     | IV   | Quinupristin/Dalfupristin     | IV   |
| Ceftriaxone                   | IV   | Gentamicin                    | IV   | Vancomycin                    | IV   |
| Ertapenem                     | IV   | Imipenem                      | IV   |                               |      |
| Gentamicin                    | IV   | Meropenem                     | IV   |                               |      |
| Imipenem                      | IV   | Piperacillin-Tazobactam       | IV   |                               |      |
| Meropenem                     | IV   | Tobramycin                    | IV   |                               |      |
| Piperacillin-Tazobactam       | IV   |                               |      |                               |      |
| Tobramycin                    | IV   |                               |      |                               |      |

**Supplementary Table 4 | Additional sensitivity analyses.**

| <b>Bacteria</b>    | <b>Variable</b>    | <b>Sensitivity A</b>             | <b>Sensitivity B</b>             | <b>Sensitivity C</b>             | <b>Sensitivity D</b>            | <b>Sensitivity E</b>             | <b>Sensitivity F</b>           |
|--------------------|--------------------|----------------------------------|----------------------------------|----------------------------------|---------------------------------|----------------------------------|--------------------------------|
| <i>E. coli</i>     | Minimum temp       | 0.44<br>( <i>&lt;0.0001</i> )    | 0.47<br>( <i>&lt;0.0001</i> )    | 0.34<br>( <i>&lt;0.0001</i> )    | 0.41<br>( <i>&lt;0.0001</i> )   | 0.38<br>( <i>&lt;0.0001</i> )    |                                |
|                    | Prescription rate  | 0.12<br>( <i>&lt;0.0001</i> )    | 0.11<br>( <i>&lt;0.0001</i> )    | 0.11<br>( <i>&lt;0.0001</i> )    | 0.12<br>( <i>&lt;0.0001</i> )   | 0.12<br>( <i>&lt;0.0001</i> )    |                                |
|                    | Outpatient         | -2.99<br>(0.09)                  | -3.30<br>( <i>&lt;0.001</i> )    | -4.23<br>(0.04)                  | -2.98<br>(0.07)                 | -3.08<br>(0.07)                  |                                |
|                    | Lab standard       | -3.82<br>(0.09)                  | -2.43<br>(0.18)                  | -5.49<br>(0.07)                  | -3.20<br>(0.14)                 | -3.13<br>(0.16)                  |                                |
|                    | Population density | 0.00028<br>(0.13)                | 0.00030<br>(0.06)                | 0.00020<br>(0.20)                | --                              | 0.00015<br>(0.28)                |                                |
|                    | Median income      |                                  | --                               |                                  | 0.00029<br>( <i>&lt;0.001</i> ) | 0.00025<br>(0.001)               |                                |
|                    | Blood              |                                  | -3.93<br>(0.04)                  |                                  |                                 |                                  |                                |
|                    | Respiratory        |                                  | 2.95<br>(0.29)                   |                                  |                                 |                                  |                                |
|                    | Urine              |                                  | -1.15<br>(0.28)                  |                                  |                                 |                                  |                                |
|                    | Other sterile      |                                  | 11.91<br>( <i>&lt;0.001</i> )    |                                  |                                 |                                  |                                |
|                    | Other nonsterile   |                                  | -14.29<br>( <i>&lt;0.0001</i> )  |                                  |                                 |                                  |                                |
|                    | <i>Klebsiella</i>  | Minimum temp                     | 0.23<br>( <i>&lt;0.001</i> )     | 0.22<br>( <i>&lt;0.0001</i> )    | 0.29<br>( <i>&lt;0.0001</i> )   | 0.28<br>( <i>&lt;0.0001</i> )    | 0.21<br>( <i>&lt;0.0001</i> )  |
| Prescription rate  |                    | 0.04<br>( <i>&lt;0.0001</i> )    | 0.03<br>( <i>&lt;0.0001</i> )    | 0.02<br>( <i>&lt;0.0001</i> )    | 0.03<br>( <i>&lt;0.0001</i> )   | 0.03<br>( <i>&lt;0.0001</i> )    |                                |
| Outpatient         |                    | -2.68<br>(0.20)                  | -2.75<br>(0.13)                  | -4.00<br>(0.15)                  | -2.55<br>(0.19)                 | -2.91<br>(0.15)                  |                                |
| Lab standard       |                    | -0.40<br>(0.76)                  | -0.38<br>(0.66)                  | -0.43<br>(0.74)                  | -0.71<br>(0.65)                 | -0.34<br>(0.76)                  |                                |
| Population density |                    | 0.00062<br>( <i>&lt;0.0001</i> ) | 0.00060<br>( <i>&lt;0.0001</i> ) | 0.00064<br>( <i>&lt;0.0001</i> ) | --                              | 0.00058<br>( <i>&lt;0.0001</i> ) |                                |
| Median income      |                    |                                  | --                               |                                  | 0.00028<br>(0.16)               | 0.00004<br>(0.79)                |                                |
| Blood              |                    |                                  | -0.53<br>(0.65)                  |                                  |                                 |                                  |                                |
| Respiratory        |                    |                                  | 1.27<br>(0.37)                   |                                  |                                 |                                  |                                |
| Urine              |                    |                                  | -1.86<br>(0.27)                  |                                  |                                 |                                  |                                |
| Other sterile      |                    |                                  | -10.64<br>( <i>&lt;0.0001</i> )  |                                  |                                 |                                  |                                |
| Other nonsterile   |                    |                                  | 10.35<br>( <i>&lt;0.0001</i> )   |                                  |                                 |                                  |                                |
| <i>S. aureus</i>   |                    | Minimum temp                     | 0.68<br>(0.002)                  | 0.19<br>( <i>&lt;0.0001</i> )    | 0.39<br>(0.14)                  | 0.28<br>(0.18)                   | 0.28<br>(0.18)                 |
|                    | Prescription rate  | 0.12<br>( <i>&lt;0.0001</i> )    | 0.13<br>( <i>&lt;0.0001</i> )    | 0.10<br>( <i>&lt;0.001</i> )     | 0.13<br>( <i>&lt;0.0001</i> )   | 0.13<br>( <i>&lt;0.0001</i> )    | 0.17<br>( <i>&lt;0.0001</i> )  |
|                    | Outpatient         | -7.93<br>( <i>&lt;0.0001</i> )   | -4.47<br>( <i>&lt;0.001</i> )    | -0.18<br>(0.89)                  | -3.92<br>(0.006)                | -3.86<br>(0.008)                 | -6.22<br>( <i>&lt;0.0001</i> ) |
|                    | Lab standard       | -1.38<br>(0.55)                  | -3.89<br>(0.06)                  | -9.50<br>(0.05)                  | -3.62<br>(0.03)                 | -3.65<br>(0.05)                  | -2.69<br>(0.08)                |
|                    | Population density | 0.00006<br>(0.14)                | 0.00000<br>(0.97)                | -0.00013<br>(0.44)               | --                              | -0.00003<br>(0.84)               | 0.00014<br>(0.15)              |
|                    | Median income      |                                  | --                               |                                  | 0.00010<br>(0.38)               | 0.00020<br>(0.33)                |                                |
|                    | Blood              |                                  | -4.24<br>( <i>&lt;0.001</i> )    |                                  |                                 |                                  |                                |
|                    | Respiratory        |                                  | 2.78<br>0.22                     |                                  |                                 |                                  |                                |
|                    | Urine              |                                  | 8.59<br>( <i>&lt;0.001</i> )     |                                  |                                 |                                  |                                |
|                    | Other sterile      |                                  | -17.63<br>( <i>&lt;0.0001</i> )  |                                  |                                 |                                  |                                |
|                    | Other nonsterile   |                                  | 19.80<br>( <i>&lt;0.0001</i> )   |                                  |                                 |                                  |                                |

(A) restriction of the full adjusted model to only health systems, hospitals, or laboratories (excluding surveillance bodies); (B) full adjusted model with restriction of the dataset to only locations with multiple years represented within the database; (C) full adjusted model with addition of binary predictors for isolate types; (D) full adjusted model with substitution of population density variable with median income; (E) full adjusted model with addition of median income; and (F) full adjusted model for *S. aureus* with cephalexin and nafcillin excluded. P-values are shown in parentheses (.). All analyses were restricted to subset of antibiotic susceptibilities for dates and classes of antibiotics corresponding to available prescribing rate data.

## Supplementary References

1. IUPAC, Fischer, J. & Robin Ganellin, C. *Analogue-based Drug Discovery*. (John Wiley & Sons, 2006).
